# Supplementary material for: Soluble and cell-based markers of immune checkpoint inhibitor-associated nephritis
Source: PubMed Central journal article supplement — J Immunother Cancer. 2023 Jan 19;11(1):e006222. doi: 10.1136/jitc-2022-006222 (PMC9853261; doi:10.1136/jitc-2022-006222), 2023-01-19
Supplement: jitc-2022-006222supp001.pdf [file jitc-2022-006222supp001.pdf]

Supplemental Figure 1. sIL-2R levels of ICI-nephritis cases by ICI class

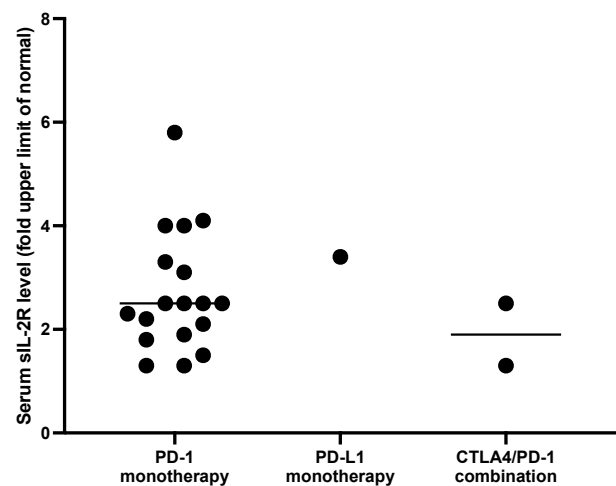

**Figure S1.** sIL-2R levels of ICI-nephritis cases by ICI class. PD-1 monotherapy includes cemiplimab, nivolumab and pembrolizumab; PD-L1 monotherapy includes atezolizumab; CTLA-4/PD-1 combination includes ipilimumab/nivolumab. Symbols represent unique individuals; bars represent median.

**Supplemental Figure 2. External validation cohort for diagnostic performance of sIL-2R in ICI-treated patients who developed AKI**

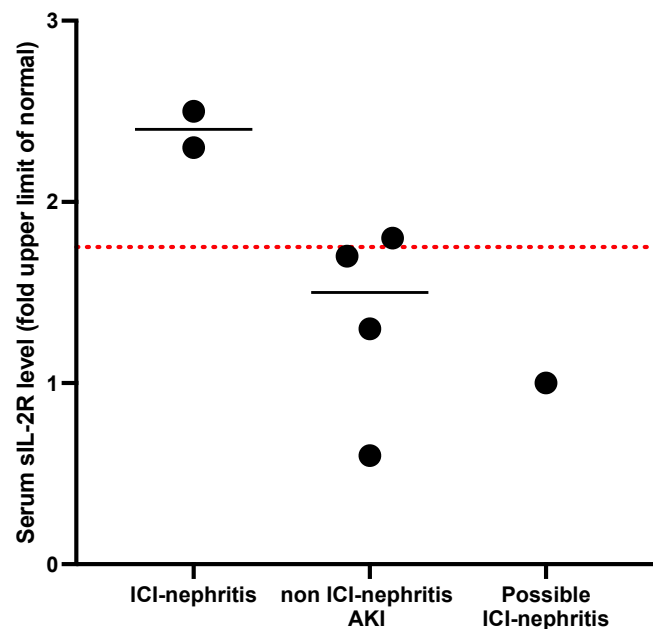

**Figure S2.** External validation cohort for diagnostic performance of sIL-2R in ICI-treated patients who developed AKI. ICI-nephritis include biopsy-proven ICI-nephritis (N=1) and clinically adjudicated ICI-nephritis (N=1); non ICI-nephritis AKI include biopsy-proven acute tubular necrosis (N=1) and clinically adjudicated hemodynamic AKI (N=3).

**Supplemental Figure 3. Linear correlation between B cell phenotypes and CD8+ T cells and within different B cell phenotypes**

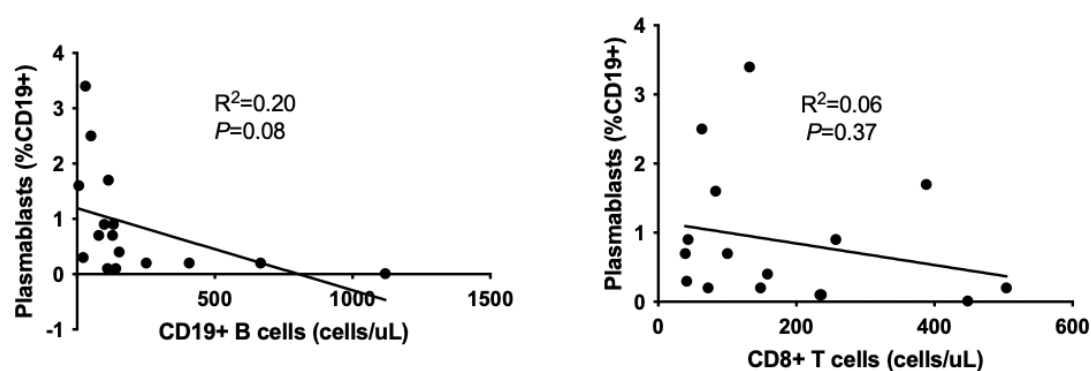

**Figure S3.** Linear correlation between percentage of plasmablasts and total CD19+ B cell count (left), percentage of plasmablast and CD8+ T cells (right). Symbols represent unique individuals; straight line represents fitted regression line;  $R^2$  and P values are indicated in the graphs.

**Supplemental Figure 4. Comparison of sIL-2R level, peripheral T and B cell markers in patients with ICI-nephritis who were diagnosed with kidney biopsy and who were diagnosed by clinical adjudication**

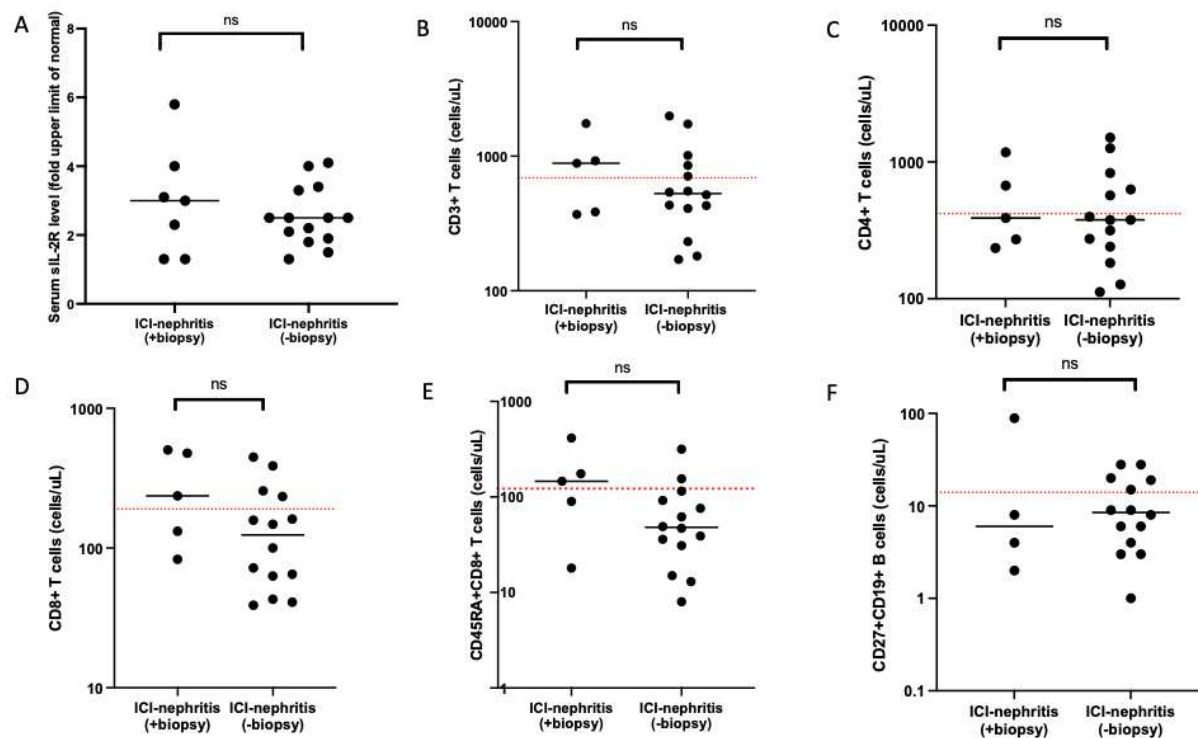

**Figure S4.** (A) Fold ULN of serum sIL-2R level were compared between patients with ICI-nephritis (N=7) who were diagnosed with kidney biopsy and who were diagnosed by clinical criteria (N=14). (B–F) Absolute total lymphocyte counts as indicated (cells/uL), shown in log scale, were compared between patients with ICI-nephritis who were diagnosed with kidney biopsy (N=5) and who were diagnosed by clinical criteria (N=14) who received concurrent chemotherapy (N=4). Symbols represent unique individuals; bars represent geometric means (95% confidence intervals) of total indicated patients; red dotted line represent lower limit of normal of the assay. ns=non-significant

**Supplemental Figure 5. Comparison of peripheral T and B cell markers in patients with ICI-nephritis who received concurrent chemotherapy with ICI or who received ICI therapy alone**

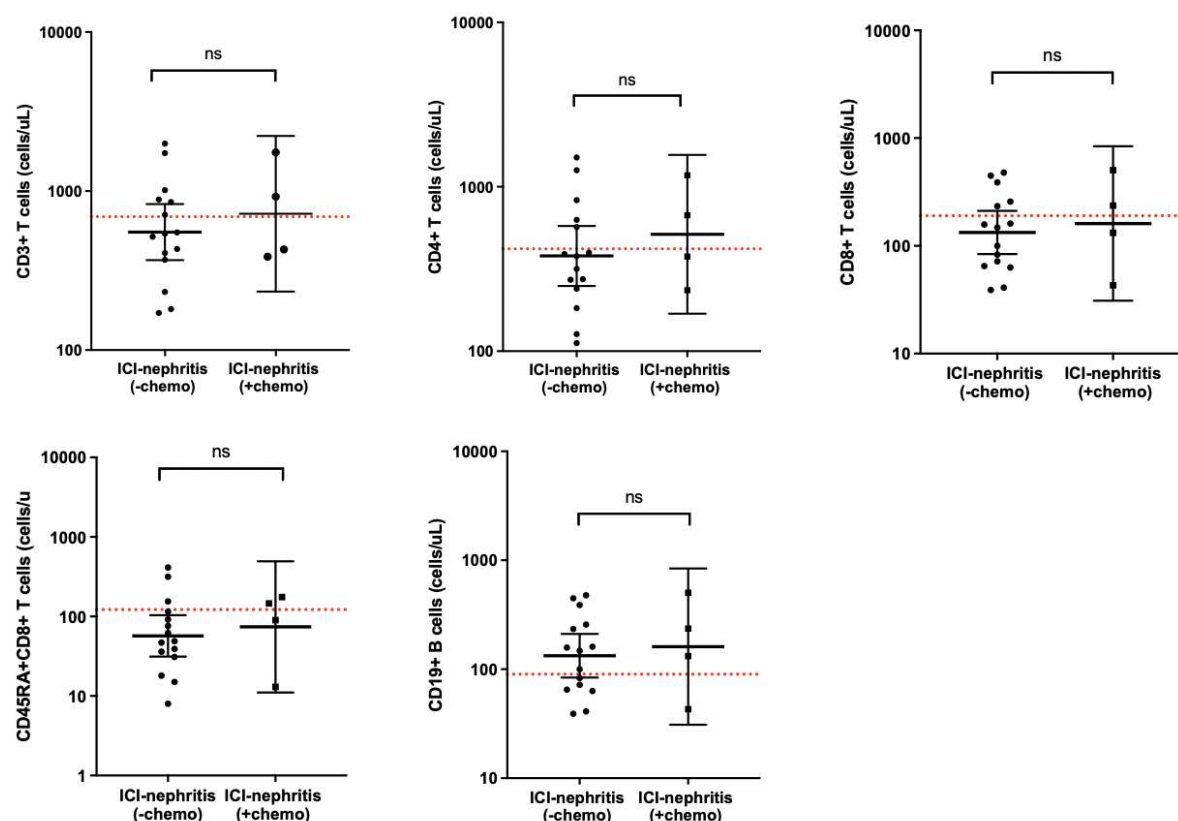

**Figure S5.** Absolute total lymphocyte counts as indicated (cells/uL), shown in log scale, compared between patients with ICI-nephritis who were treated with ICI alone (N=15) and who received concurrent chemotherapy (N=4). Symbols represent unique individuals; bars represent geometric means (95% confidence intervals) of total indicated patients; red dotted line represent lower limit of normal of the assay. ns=non-significant.

**Supplemental Table 1. Case summaries for hemodynamic AKI control group**

| Patient ID | Age/race    | Baseline creatinine (mg/dL) <sup>a</sup> | Peak creatinine (mg/dL) | sIL-2R (fold ULN) | Diagnosis                  |
|------------|-------------|------------------------------------------|-------------------------|-------------------|----------------------------|
| 1          | 80-90 yo HF | 1.3                                      | 3.0                     | 1.1               | Cardiorenal syndrome       |
| 2          | 70-80 yo WM | 1.2                                      | Required RRT            | 1.7               | Ischemic ATN               |
| 3          | 40-50 yo WF | 0.7                                      | 2.3                     | 0.5               | Myoglobin cast nephropathy |
| 4          | 50-60 yo AM | 1.5                                      | 3.4                     | 0.8               | Ischemic ATN               |
| 5          | 50-60 yo BM | 1.0                                      | 4.4                     | 1.0               | Ischemic ATN               |
| 6          | 70-80 yo HM | 1.4                                      | 1.9                     | 0.7               | Ischemic ATN               |

**Table S1.** Case summaries for hemodynamic AKI control group. a. case 3,4 and 6 do not have pre-AKI creatinine available within 90 days. Their baseline creatinine was imputed from creatinine nadir during hospitalization. Age ranges in 10-year intervals are used to protect patients' confidentiality. Abbreviations: sIL-2R=soluble interleukin 2 receptor; HF=Hispanic female; WM=White male; WF=White female; AM=Asian male; BM=Black male; HM=Hispanic male; RRT=renal replacement therapy; AKI=acute kidney injury; ATN=acute tubular necrosis; CKD=chronic kidney disease

**Supplemental Table 2. Case summaries for non-ICI AIN group**

| Patient ID | Age/race    | Baseline creatinine (mg/dL) | Peak creatinine (mg/dL) | sIL-2R (fold ULN) | Diagnosis            |
|------------|-------------|-----------------------------|-------------------------|-------------------|----------------------|
| 1          | 50-60 yo WF | 0.8                         | 1.6                     | 1.2               | TINU syndrome        |
| 2          | 70-80 yo AM | 1.5 <sup>a</sup>            | 5.3                     | 4.1               | IgG4-related disease |
| 3          | 30-40 yo WF | 0.9                         | 2.7                     | 2.5               | TINU syndrome        |
| 4          | 30-40 yo WF | 0.9                         | 1.1                     | 2.8               | TINU syndrome        |
| 5          | 70-80 yo BM | 3.0                         | 4.5                     | 1.6               | PPI-associated AIN   |

**Table S2.** Case summaries for non-ICI-nephritis group. a. case 2 does not have pre-AKI baseline creatinine available within 90 days. Baseline creatine was imputed from creatinine nadir during follow-up course. Age ranges in 10-year intervals are used to protect patients' confidentiality. Abbreviations: sIL-2R=soluble interleukin 2 receptor; WF=White female; AM=Asian male; BM=Black male; TINU=tubulointerstitial nephritis and uveitis syndrome; PPI=proton pump inhibitor; AIN=acute interstitial nephritis

**Supplemental Table 3. Genes included in IL-2 family pathway score and T cell receptor pathway score**

| IL-2 family pathway score | T cell receptor pathway score |        |
|---------------------------|-------------------------------|--------|
| HAVCR2                    | CD247                         | IL5    |
| IL15                      | CD28                          | INPP5D |
| IL2                       | CD3D                          | JUN    |
| IL21                      | CD3E                          | LCK    |
| IL21R                     | CD3G                          | LCP2   |
| IL2RA                     | CD4                           | MAPK11 |
| IL2RB                     | CD40LG                        | MAPK12 |
| IL2RG                     | CD45R0                        | MAPK13 |
| IL5                       | CD45RA                        | MAPK14 |
| INPP5D                    | CD45RB                        | NFATC1 |
| JAK1                      | CD8A                          | NFATC2 |
| JAK2                      | CD8B                          | NFKB1  |
| JAK3                      | CHUK                          | NFKBIA |
| LCK                       | CSF2                          | PDCD1  |
| PIK3CD                    | CTLA4                         | PIK3CD |
| PTPN6                     | FOS                           | PPP3CA |
| STAT1                     | FYN                           | PSMB10 |
| STAT3                     | HAVCR1                        | PSMB8  |
| STAT4                     | HLA-DPA1                      | PSMB9  |
| STAT5A                    | HLA-DPB1                      | PSME1  |
| STAT5B                    | HLA-DQA1                      | PSME2  |
| SYK                       | HLA-DQB1                      | PTPN22 |
|                           | HLA-DRA                       | PTPN6  |
|                           | HLA-DRB1                      | PTPRC  |
|                           | HLA-DRB3                      | RAF1   |
|                           | ICOS                          | RELA   |
|                           | IFNG                          | SLA    |
|                           | IKBKB                         | TNF    |
|                           | IKBKG                         | TRAF6  |
|                           | IL10                          | TRAT1  |
|                           | IL2                           | TRDC   |
|                           | IL4                           | TRDV3  |
|                           |                               | ZAP70  |

**Supplemental Table 3.** The pathway score is equal to the first principal component of the gene set.

**Supplemental Table 4. Case summaries for external validation cohort**

| Patient ID | Age/race    | Baseline creatinine (mg/dL) | Peak creatinine (mg/dL) | Cancer Type             | ICI therapy | sIL-2R (fold ULN) | Diagnosis                            |
|------------|-------------|-----------------------------|-------------------------|-------------------------|-------------|-------------------|--------------------------------------|
| 1          | 60—70 yo AM | 0.9                         | 3.3                     | SCC of larynx           | Pembro      | 2.5               | ICI-nephritis (biopsy proven)        |
| 2          | 70—80 yo WF | 1.6                         | 2.9                     | Sacral sarcoma          | Pembro      | 2.3               | ICI-nephritis (clinically diagnosed) |
| 3          | 70—80 yo WM | 1.1                         | 1.8                     | Peritoneal mesothelioma | Ipi/nivo    | 1.8               | ATN (biopsy proven)                  |
| 4          | 60—70 yo WM | 1.1                         | 3.7                     | Lung adenocarcinoma     | Pembro      | 0.6               | Ischemic ATN (clinically diagnosed)  |
| 5          | 60—70 yo WF | 1.2                         | 2.2                     | Pleural mesothelioma    | Ipi/nivo    | 1.7               | Pre-renal AKI                        |
| 6          | 60—70 yo HM | 1.2                         | 1.9                     | Metastatic RCC          | Nivo        | 0.3               | Pre-renal AKI                        |
| 7          | 60—70 yo WF | 0.9                         | 1.4                     | Metastatic RCC          | Ipi/nivo    | 1.0               | Possible ICI-nephritis               |

**Table S4.** Case summaries for the external validation cohort. Age ranges in 10-year intervals are used to protect patients' confidentiality. Abbreviations: sIL-2R=soluble interleukin 2 receptor; AM=Asian male; WF=White female; WM=White male; HM=Hispanic male; SCC=squamous cell cancer; RCC=renal cell carcinoma; pembro=pembrolizumab; ipi/nivo=ipilimumab/nivolumab; AKI=acute kidney injury; ATN=acute tubular necrosis
